# Supplementary material
Source: Springer Nature journal article supplement (https://www.springermedizin.de/resource/supplementary/12986_2009_231_MOESM7_ESM.pdf/25655638)

LETO

OLETF

Standard diet

High fat diet

Standard diet

High fat diet

Claudin-3

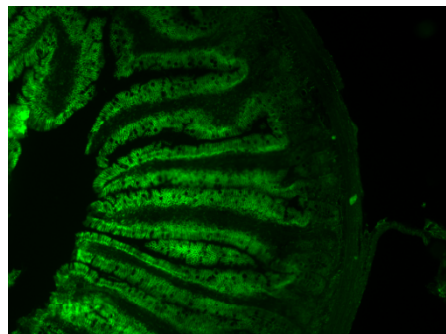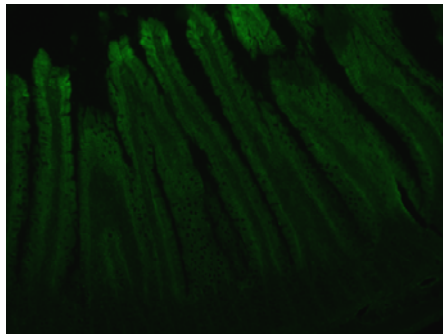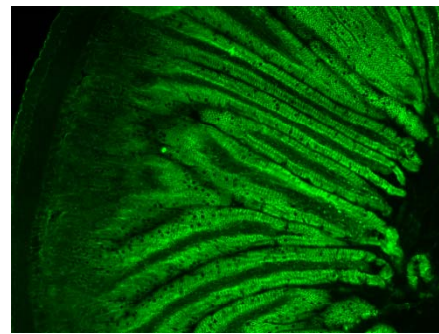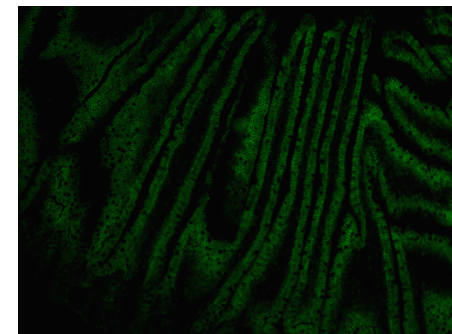

Actin/Nucleus

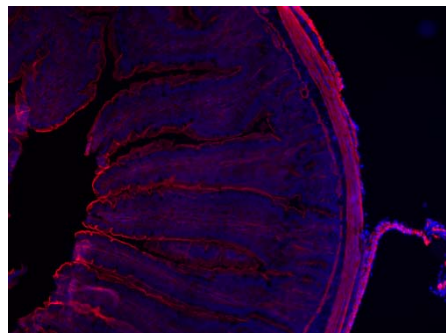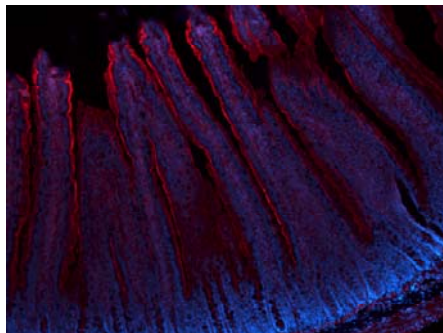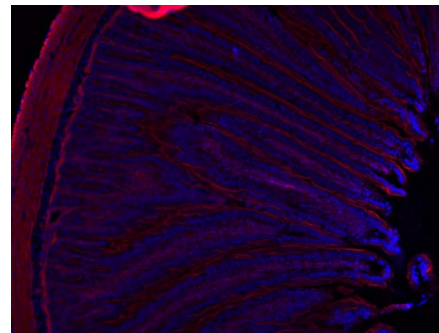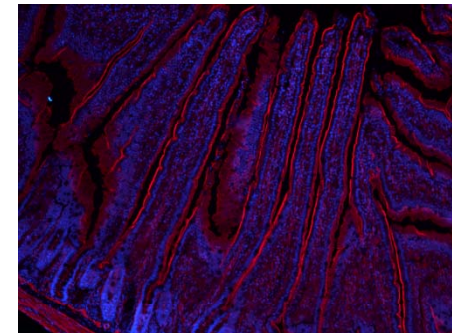

Claudin-3/Actin/Nucleus

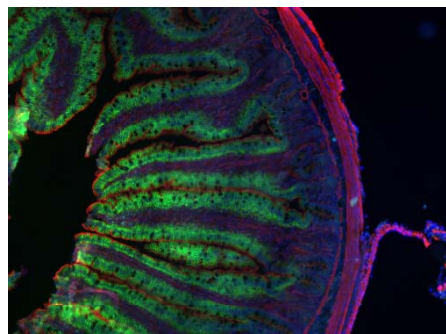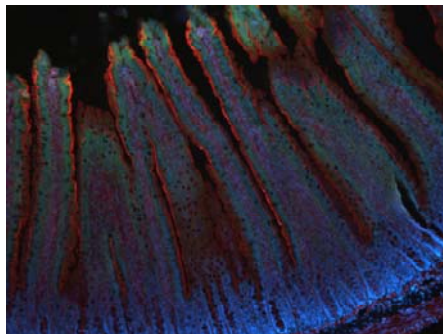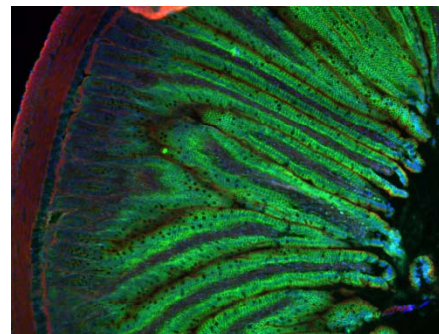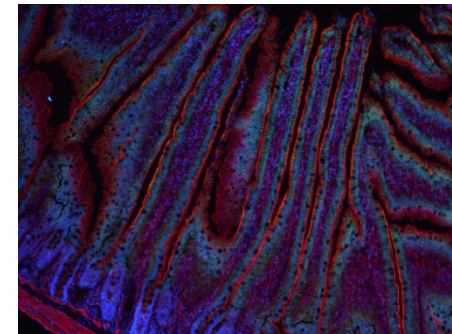

Supplement: MOESM7 [file 25655638]
